# Supplementary material for: Finding Influential Spreaders from Human Activity beyond Network Location
Source: PubMed Central journal article supplement (PMC4554996; doi:10.1371/journal.pone.0136831), 2015-08-31
Supplement: pone.0136831.s001.pdf [file pone.0136831.s001.pdf]

## Supporting information S1 File

Finding influential spreaders from human activity beyond network location

Byungjoon Min<sup>1,\*</sup>, Fredrik Liljeros<sup>2,3</sup>, Hernán A. Makse<sup>1</sup>

**1 Levich Institute and Physics Department, City College of New York, New York, NY, US**

**2 Department of Sociology, Stockholm University, Stockholm, Sweden**

**3 Institute for Futures Study, Stockholm, Sweden**

**\* E-mail: [min.byungjoon@gmail.com](mailto:min.byungjoon@gmail.com)**

**Table A. Multilinear regression for the QXF network with Eq. (1).**

$$M_i = c_0 + c_1 a_i^{exc} + c_2 a_i^{bal} + c_3 a_i^{ca} + c_4 a_i^{sh} + c_5 k_i + c_6 k_i^{sh} + c_7 k_i^{2sum} + c_8 k_i^{sum} + \epsilon.$$

| intercept              | $k_{sh}$              | $k_{2sum}$              | $k_{sum}$                | $k$                     | exchange              | balance              | col. act.                         | str. hole             | $R^2$      |
|------------------------|-----------------------|-------------------------|--------------------------|-------------------------|-----------------------|----------------------|-----------------------------------|-----------------------|------------|
| -0.953***<br>[0.0199]  | 0.118***<br>[1.41e-3] | 6.82e-6***<br>[1.22e-7] | 5.63e-5***<br>[2.76e-6]  | 4.41e-3***<br>[1.65e-4] | -0.353***<br>[0.0253] | 0.330***<br>[0.0258] | 0.153*<br>[0.0390]                | -0.379***<br>[0.0781] | 0.950<br>- |
| -0.0859***<br>[0.0211] | -<br>-                | 1.49e-5***<br>[9.22e-8] | -2.51e-5***<br>[3.19e-6] | 6.01e-3***<br>[2.02e-4] | -0.374***<br>[0.0313] | 0.766***<br>[0.0312] | 0.0890 <sup>NS</sup><br>[0.0482]  | -1.02***<br>[0.0962]  | 0.923<br>- |
| -1.20***<br>[0.0216]   | 0.181***<br>[9.64e-4] | -<br>-                  | 1.64e-4***<br>[2.21e-6]  | 2.40e-3***<br>[1.79e-4] | -0.367***<br>[0.0281] | 0.103***<br>[0.0283] | 0.359***<br>[0.0432]              | -0.298***<br>[0.0869] | 0.938<br>- |
| -0.983***<br>[0.0202]  | 0.108***<br>[1.34e-3] | 8.54e-6***<br>[8.89e-8] | -<br>-                   | 6.88e-3***<br>[1.14e-4] | -0.338***<br>[0.0256] | 0.388***<br>[0.0260] | 0.198***<br>[0.0395]              | -0.414***<br>[0.0793] | 0.948<br>- |
| -0.868***<br>[0.0202]  | 0.123***<br>[1.44e-3] | 6.11e-6***<br>[1.22e-7] | 1.11e-4***<br>[1.92e-6]  | -<br>-                  | -0.402***<br>[0.0259] | 0.350***<br>[0.0264] | -0.0573 <sup>NS</sup><br>[0.0392] | -0.330***<br>[0.0801] | 0.947<br>- |
| -1.03***<br>[0.0194]   | 0.118***<br>[1.42e-3] | 6.84e-6***<br>[1.22e-7] | 5.52e-5***<br>[2.78e-6]  | 4.58e-3***<br>[1.65e-4] | -<br>-                | 0.264***<br>[0.0255] | 0.197***<br>[0.0391]              | -0.426***<br>[0.0786] | 0.949<br>- |
| -0.961***<br>[0.0200]  | 0.122***<br>[1.39e-3] | 6.58e-6***<br>[1.21e-7] | 6.02e-5***<br>[2.76e-6]  | 4.47e-3***<br>[1.66e-4] | -0.294***<br>[0.0250] | -<br>-               | 0.235***<br>[0.0387]              | -0.511***<br>[0.0779] | 0.949<br>- |
| -0.907***<br>[0.0161]  | 0.118***<br>[1.41e-3] | 6.87e-6***<br>[1.21e-7] | 5.70e-5***<br>[2.76e-6]  | 4.28e-3***<br>[1.61e-4] | -0.361***<br>[0.0252] | 0.347***<br>[0.0254] | -<br>-                            | -0.313***<br>[0.0763] | 0.950<br>- |
| -0.963***<br>[0.0199]  | 0.119***<br>[1.41e-3] | 6.81e-6***<br>[1.22e-7] | 5.66e-5***<br>[2.76e-6]  | 4.39e-3***<br>[1.65e-4] | -0.358***<br>[0.0253] | 0.347***<br>[0.0256] | -0.112**<br>[0.0381]              | -<br>-                | 0.950<br>- |
| -2.05***<br>[0.0247]   | 0.281***<br>[0.00114] | -<br>-                  | -<br>-                   | -<br>-                  | -<br>-                | -<br>-               | -<br>-                            | -<br>-                | 0.823<br>- |
| -0.121***<br>[0.0126]  | -<br>-                | 1.64e-5***<br>[4.54e-8] | -<br>-                   | -<br>-                  | -<br>-                | -<br>-               | -<br>-                            | -<br>-                | 0.908<br>- |
| 1.49***<br>[0.0160]    | -<br>-                | -<br>-                  | 3.54e-4***<br>[1.75e-6]  | -<br>-                  | -<br>-                | -<br>-               | -<br>-                            | -<br>-                | 0.757<br>- |
| 1.92***<br>[0.0202]    | -<br>-                | -<br>-                  | -<br>-                   | 0.0280***<br>[0.000208] | -<br>-                | -<br>-               | -<br>-                            | -<br>-                | 0.580<br>- |

Coefficients [standard errors] for the linear models. Here, \* \* \* denotes  $p < 0.001$ , \*\* denotes  $p < 0.01$ , \* denotes  $p < 0.05$ , and *NS* denotes not significant with significant level of p-value 0.05.

**Table B. Multilinear regression for the QXG network with Eq. (1).**

$$M_i = c_0 + c_1 a_i^{exc} + c_2 a_i^{bal} + c_3 a_i^{ca} + c_4 a_i^{sh} + c_5 k_i + c_6 k_i^{sh} + c_7 k_i^{2sum} + c_8 k_i^{sum} + \epsilon.$$

| intercept             | $k_{sh}$              | $k_{2sum}$              | $k_{sum}$                | $k$                     | exchange                           | balance              | coll. act.                        | str. hole             | $R^2$ |
|-----------------------|-----------------------|-------------------------|--------------------------|-------------------------|------------------------------------|----------------------|-----------------------------------|-----------------------|-------|
| -0.831***<br>[0.0206] | 0.238***<br>[2.67e-3] | 5.97e-5***<br>[7.71e-7] | -5.16e-4***<br>[1.88e-5] | 1.20e-2***<br>[3.86e-4] | -4.02e-3 <sup>NS</sup><br>[0.0210] | 0.400***<br>[0.0276] | 0.157***<br>[0.0435]              | -0.295***<br>[0.0580] | 0.966 |
| 0.268***<br>[0.0228]  |                       | 1.09e-4***<br>[7.45e-7] | -1.38e-3***<br>[2.22e-5] | 1.79e-2***<br>[5.26e-4] | 0.248***<br>[0.0288]               | 0.951***<br>[0.0372] | 0.339***<br>[0.0601]              | -0.852***<br>[0.0797] | 0.934 |
| -1.31***<br>[0.0254]  | 0.386***<br>[2.42e-3] |                         | 7.48e-4***<br>[1.20e-5]  | 5.66e-3***<br>[4.90e-4] | -0.179***<br>[0.0271]              | 0.0961**<br>[0.0354] | 0.436***<br>[0.0563]              | -2.27**<br>[0.0753]   | 0.942 |
| -0.902***<br>[0.0213] | 0.277***<br>[2.38e-3] | 4.12e-5***<br>[3.95e-7] |                          | 5.67e-3***<br>[3.24e-4] | -0.0801***<br>[0.0217]             | 0.313***<br>[0.0285] | 0.149**<br>[0.0453]               | -2.63***<br>[0.0604]  | 0.963 |
| -0.764***<br>[0.0215] | 0.253***<br>[2.77e-3] | 5.46e-5***<br>[7.94e-7] | -1.72e-4***<br>[1.59e-5] |                         | -0.104***<br>[0.0219]              | 0.392***<br>[0.0290] | -0.0513 <sup>NS</sup><br>[0.0453] | -0.270***<br>[0.0611] | 0.962 |
| -0.832***<br>[0.0205] | 0.238***<br>[2.65e-3] | 5.97e-5***<br>[7.67e-6] | -5.17e-4***<br>[1.86e-5] | 1.20e-2***<br>[3.81e-4] |                                    | 0.400***<br>[0.0274] | 0.155***<br>[0.0423]              | -0.295***<br>[0.0579] | 0.966 |
| -0.864***<br>[0.0207] | 0.247***<br>[2.63e-3] | 5.81e-5***<br>[7.72e-7] | -4.85e-4***<br>[1.89e-5] | 1.19e-2***<br>[3.91e-4] | 0.315 <sup>NS</sup><br>[0.0211]    |                      | 0.285***<br>[0.0431]              | -0.449***<br>[0.0577] | 0.965 |
| -0.796***<br>[0.0182] | 0.239***<br>[2.67e-3] | 5.99e-5***<br>[7.69e-7] | -5.16e-4***<br>[1.88e-5] | 1.17e-2***<br>[3.82e-4] | 0.0137 <sup>NS</sup><br>[0.0204]   | 0.420***<br>[0.0270] |                                   | -2.20***<br>[0.0542]  | 0.966 |
| -0.833***<br>[0.0206] | 0.240***<br>[2.66e-3] | 5.96e-5***<br>[7.72e-7] | -5.14e-4***<br>[1.88e-5] | 1.19e-2***<br>[3.86e-4] | -0.00865 <sup>NS</sup><br>[0.0210] | 0.426***<br>[0.0271] | 0.0781 <sup>NS</sup><br>[0.0407]  |                       | 0.966 |
| -2.22***<br>[0.0351]  | 0.600***<br>[0.00306] |                         |                          |                         |                                    |                      |                                   |                       | 0.815 |
| 0.918***<br>[0.0160]  |                       | 7.08e-5***<br>[2.58e-7] |                          |                         |                                    |                      |                                   |                       | 0.896 |
| 1.79***<br>[0.0224]   |                       |                         | 1.58e-3***<br>[9.76e-6]  |                         |                                    |                      |                                   |                       | 0.750 |
| 2.09***<br>[0.0269]   |                       |                         |                          | 0.0628***<br>[0.000522] |                                    |                      |                                   |                       | 0.624 |

Coefficients [standard errors] for the linear models. Every row corresponds to a different model. Here, \* \* \* denotes  $p < 0.001$ , \*\* denotes  $p < 0.01$ , \* denotes  $p < 0.05$ , and *NS* denotes not significant.

Table C. Multilinear regression for the POK network with Eq. (1).

$$M_i = c_0 + c_1 a_i^{exc} + c_2 a_i^{bal} + c_3 a_i^{ca} + c_4 a_i^{sh} + c_5 k_i + c_6 k_i^{sh} + c_7 k_i^{2sum} + c_8 k_i^{sum}.$$

| intercept             | $k_{sh}$                | $k_{2sum}$                         | $k_{sum}$                | $k$                     | exchange               | balance                           | coll. act.            | str. hole             | $R^2$ |
|-----------------------|-------------------------|------------------------------------|--------------------------|-------------------------|------------------------|-----------------------------------|-----------------------|-----------------------|-------|
| -1.19***<br>[0.0159]  | 0.457***<br>[2.56e-3]   | 2.62e-5***<br>[1.03e-6]            | -1.99e-4***<br>[1.14e-5] | 7.88e-3***<br>[1.71e-4] | -0.0827*<br>[0.0205]   | -0.0819*<br>[0.0401]              | 0.813***<br>[0.0360]  | -0.594***<br>[0.0456] | 0.907 |
| -0.679***<br>[0.0267] | 1.63e-4***<br>[1.19e-6] | 1.63e-4***<br>[1.19e-6]            | -1.50e-3***<br>[1.51e-5] | 2.33e-2***<br>[2.52e-4] | 0.165***<br>[0.0350]   | 0.651***<br>[0.0682]              | 1.05***<br>[0.0614]   | -1.72***<br>[0.0773]  | 0.727 |
| -1.16***<br>[0.0161]  | 0.505***<br>[1.75e-3]   | 8.02e-5***<br>[3.11e-6]            | 8.02e-5***<br>[3.11e-6]  | 5.51e-3***<br>[1.45e-4] | -0.0873***<br>[0.0209] | -0.106**<br>[0.0408]              | 0.887***<br>[0.0365]  | -0.509***<br>[0.0464] | 0.903 |
| -1.16***<br>[0.0159]  | 0.485***<br>[1.99e-3]   | 8.83e-6***<br>[2.78e-7]            | 6.12e-3***<br>[1.39e-4]  | 6.12e-3***<br>[1.39e-4] | -0.0881***<br>[0.0207] | -0.111**<br>[0.0404]              | 0.853***<br>[0.0362]  | -5.70***<br>[0.0460]  | 0.905 |
| -1.16***<br>[0.0168]  | 0.516***<br>[2.34e-3]   | 4.95e-8 <sup>NS</sup><br>[9.17e-7] | 1.12e-4***<br>[9.81e-6]  | 1.12e-4***<br>[9.81e-6] | -0.107***<br>[0.0218]  | -0.110**<br>[0.0426]              | 0.777***<br>[0.0382]  | -0.609***<br>[0.0485] | 0.895 |
| -1.21***<br>[0.0151]  | 0.456***<br>[2.55e-3]   | 2.62e-5***<br>[1.03e-6]            | -2.00e-4***<br>[1.14e-5] | 7.89e-3***<br>[1.71e-4] | -0.0952*<br>[0.0400]   | -0.0952*<br>[0.0400]              | 0.807***<br>[0.0360]  | -0.599***<br>[0.0456] | 0.906 |
| -1.19***<br>[0.0159]  | 0.456***<br>[2.54e-3]   | 2.62e-5***<br>[1.03e-6]            | -2.00e-4***<br>[1.14e-5] | 7.88e-3***<br>[1.71e-4] | -0.0861***<br>[0.0204] | -0.0861***<br>[0.0204]            | 0.809***<br>[0.0359]  | -0.586***<br>[0.0455] | 0.907 |
| 0.963***<br>[0.0126]  | 0.459***<br>[2.59e-3]   | 2.81e-5***<br>[1.04e-6]            | -2.16e-4***<br>[1.16e-5] | 7.79e-3***<br>[1.73e-4] | -0.0620**<br>[0.0208]  | -0.0322 <sup>NS</sup><br>[0.0406] | -0.229***<br>[0.0433] | -0.229***<br>[0.0433] | 0.904 |
| -1.17***<br>[0.0159]  | 0.461***<br>[2.54e-3]   | 2.52e-5***<br>[1.03e-6]            | -1.95e-4***<br>[1.15e-5] | 7.89e-3***<br>[1.72e-4] | -0.0906***<br>[0.0206] | 0.0399 <sup>NS</sup><br>[0.0402]  | 0.648***<br>[0.0338]  | 0.648***<br>[0.0338]  | 0.906 |
| -1.00***<br>[0.0115]  | 0.555***<br>[0.00157]   |                                    |                          |                         |                        |                                   |                       |                       | 0.883 |
| 0.638***<br>[0.0196]  |                         | 5.81e-5***<br>[4.69-7]             |                          |                         |                        |                                   |                       |                       | 0.481 |
| 1.42***<br>[0.0189]   |                         |                                    | 5.91e-4***<br>[6.59-6]   |                         |                        |                                   |                       |                       | 0.326 |
| 2.14***<br>[0.0173]   |                         |                                    |                          | 0.0230***<br>[0.000380] |                        |                                   |                       |                       | 0.180 |

Coefficients [standard errors] for the linear models. Every row corresponds to a different model. Here, \* \* \* denotes  $p < 0.001$ , \*\* denotes  $p < 0.01$ , \* denotes  $p < 0.05$ , and *NS* denotes not significant.

Table D. Multilinear regression for the LJ network with Eq. (1).

$$M_i = c_0 + c_1 a_i^{exc} + c_2 a_i^{bal} + c_3 a_i^{ca} + c_4 a_i^{sh} + c_5 k_i + c_6 k_i^{sh} + c_7 k_i^{2sum} + c_8 k_i^{sum}.$$

| intercept                          | $k_{sh}$               | $k_{2sum}$              | $k_{sum}$                | $k$                                 | exchange             | balance              | coll. act.                        | str. hole             | $R^2$  |
|------------------------------------|------------------------|-------------------------|--------------------------|-------------------------------------|----------------------|----------------------|-----------------------------------|-----------------------|--------|
| 0.0698***<br>[0.0138]              | 0.0887***<br>[5.41e-4] | 7.79e-6***<br>[4.34e-8] | -5.76e-5***<br>[5.78e-7] | 1.61e-3***<br>[3.93e-5]             | 0.386*<br>[0.0699]   | 0.307***<br>[0.0366] | -2.39***<br>[0.0345]              | -0.129***<br>[0.0373] | 0.682  |
| 0.396***<br>[0.0162]               |                        | 7.99e-6***<br>[5.16e-8] | -4.51e-5***<br>[6.81e-7] | 2.48e-3***<br>[4.63e-5]             | 0.912***<br>[0.0830] | 2.99***<br>[0.0389]  | -0.277***<br>[0.0411]             | -2.11***<br>[0.0439]  | 0.551  |
| 0.782***<br>[0.0161]               | 0.0913***<br>[6.61e-4] |                         | 3.43e-5***<br>[3.27e-7]  | -1.76e-5 <sup>NS</sup><br>[4.67e-5] | 0.301***<br>[0.0855] | 0.721***<br>[0.0446] | -0.0732 <sup>NS</sup><br>[0.0422] | 0.343***<br>[0.0442]  | 0.525  |
| 0.431***<br>[0.0143]               | 0.0816***<br>[5.76e-4] | 3.95e-6***<br>[2.16e-8] |                          | 3.99e-4***<br>[4.01e-5]             | 0.292***<br>[0.0750] | 0.552***<br>[0.0392] | -0.361***<br>[0.0371]             | -0.981***<br>[0.0399] | 0.634  |
| 0.128***<br>[0.0139]               | 0.0916***<br>[5.43e-4] | 7.38e-6***<br>[4.28e-8] | -5.03e-5***<br>[5.56e-7] |                                     | 0.344***<br>[0.0708] | 0.332***<br>[0.0370] | -0.342***<br>[0.0349]             | -1.30***<br>[0.0377]  | 0.674  |
| 0.0768***<br>[0.0137]              | 0.0888***<br>[5.40e-4] | 7.79e-6***<br>[4.34e-8] | -5.75e-5***<br>[5.78e-7] | 1.61e-3***<br>[3.93e-5]             |                      | 0.331***<br>[0.0363] | -0.224***<br>[0.0345]             | -1.28***<br>[0.0373]  | 0.681  |
| 0.0558***<br>[0.0137]              | 0.0907***<br>[4.84e-4] | 7.81e-6***<br>[4.34e-8] | -5.79e-5***<br>[5.77e-7] | 1.62e-3***<br>[3.93e-5]             | 0.455***<br>[0.0694] |                      | -0.152***<br>[0.0329]             | -1.33**<br>[0.0370]   | 0.682  |
| 0.00122 <sup>NS</sup><br>[0.00956] | 0.0887***<br>[5.41e-4] | 7.78e-6***<br>[4.34e-8] | -5.77e-5***<br>[5.77e-7] | 1.63e-4***<br>[3.92e-5]             | 0.400***<br>[0.0699] | 0.231***<br>[0.0349] |                                   | -0.136*<br>[0.0357]   | 0.682  |
| -0.103***<br>[0.0139]              | 0.0912***<br>[5.41e-4] | 7.43e-6***<br>[4.25e-8] | -5.59e-5***<br>[5.81e-7] | 1.62e-3***<br>[3.96e-5]             | 0.331***<br>[0.0705] | 0.475***<br>[0.0366] | -0.584***<br>[0.0334]             |                       | 0.676  |
| 1.17***<br>[0.00986]               | 0.123***<br>[0.000568] |                         |                          |                                     |                      |                      |                                   |                       | 0.420  |
| 0.713***<br>[0.0109]               |                        | 4.99e-6***<br>[2.22e-8] |                          |                                     |                      |                      |                                   |                       | 0.436  |
| 1.40***<br>[0.0105]                |                        |                         | 5.57e-5***<br>[3.26e-7]  |                                     |                      |                      |                                   |                       | 0.310  |
| 2.27***<br>[0.0106]                |                        |                         |                          | 0.00363***<br>[6.20e-5]             |                      |                      |                                   |                       | 0.0501 |

Coefficients [standard errors] for the linear models. Here, \* \* \* denotes  $p < 0.001$ , \*\* denotes  $p < 0.01$ , \* denotes  $p < 0.05$ , and <sup>NS</sup> denotes not significant with significant level of p-value 0.05.

**Table E. Multilinear regression for the PRO network with Eq. (1).**

$$M_i = c_0 + c_1 a_i^{exc} + c_2 a_i^{bal} + c_3 a_i^{ca} + c_4 a_i^{sh} + c_5 k_i + c_6 k_i^{sh} + c_7 k_i^{2sum} + c_8 k_i^{sum}.$$

| intercept             | $k_{sh}$              | $k_{2sum}$              | $k_{sum}$               | $k$                     | coll. act.           | str. hole                       | $R^2$ |
|-----------------------|-----------------------|-------------------------|-------------------------|-------------------------|----------------------|---------------------------------|-------|
| -1.12***<br>[0.0204]  | 0.610***<br>[5.36e-3] | 3.76e-4***<br>[5.09e-6] | 1.24e-4***<br>[3.58e-5] | 1.25e-2***<br>[7.59e-4] | 1.13***<br>[0.0361]  | -0.630***<br>[0.0556]           | 0.945 |
| 0.371***<br>[0.0242]  |                       | 6.35e-4***<br>[7.08e-6] | 9.69e-4***<br>[5.45e-5] | 2.74e-2***<br>[1.16e-3] | 0.604***<br>[0.0557] | 0.626***<br>[0.0846]            | 0.866 |
| -1.58***<br>[0.0246]  | 0.787***<br>[6.06e-3] |                         | 1.29e-3***<br>[4.06e-5] | 2.75e-2***<br>[9.24e-4] | 1.69***<br>[0.0446]  | 0.107 <sup>NS</sup><br>[0.0691] | 0.912 |
| -1.15***<br>[0.0193]  | 0.614***<br>[5.25e-3] | 3.84e-4***<br>[4.57e-6] |                         | 1.32e-2***<br>[7.40e-4] | 1.164***<br>[0.0347] | -0.659***<br>[0.0550]           | 0.945 |
| -1.05***<br>[0.0203]  | 0.625***<br>[5.36e-3] | 3.99e-4***<br>[4.98e-6] | 2.58e-4***<br>[3.54e-5] |                         | 0.899***<br>[0.0338] | -0.789***<br>[0.0555]           | 0.943 |
| -0.672***<br>[0.0152] | 0.589***<br>[5.59e-3] | 4.09e-4***<br>[5.24e-6] | 4.38e-4**<br>[3.62e-5]  | 3.45e-3***<br>[7.37e-4] |                      | -0.316***<br>[0.0575]           | 0.939 |
| -1.10***<br>[0.0204]  | 0.598***<br>[5.29e-3] | 3.66e-4***<br>[5.04e-6] | 1.85e-4***<br>[3.56e-5] | 1.40e-2***<br>[7.53e-4] | 1.05***<br>[0.0358]  |                                 | 0.944 |
| -1.44***<br>[0.0199]  | 1.07***<br>[0.00456]  |                         |                         |                         |                      |                                 | 0.859 |
| 0.621***<br>[0.0138]  |                       | 8.40e-4***<br>[3.71e-6] |                         |                         |                      |                                 | 0.848 |
| 1.25***<br>[0.0186]   |                       |                         | 6.12e-3***<br>[4.50e-5] |                         |                      |                                 | 0.669 |
| 1.52***<br>[0.0238]   |                       |                         |                         | 0.134***<br>[0.00154]   |                      |                                 | 0.452 |

Coefficients [standard errors] for the linear models. Here, \*\*\* denotes  $p < 0.001$ , \*\* denotes  $p < 0.01$ , \* denotes  $p < 0.05$ , and <sup>NS</sup> denotes not significant with significant level of p-value 0.05.

**Table F. Multilinear regression for the QXF network with Eqs. (2) and (5).**

$$M_i = c_0 + c_1 a_i^{exc} + c_2 a_i^{bal} + c_3 a_i^{ca} + c_4 a_i^{sh} + c_5 k_i.$$

| intercept            | $k$                     | exchange              | balance             | coll. act.         | str. hole           | $R^2$  |
|----------------------|-------------------------|-----------------------|---------------------|--------------------|---------------------|--------|
| 0.889***<br>[0.0432] | 0.0268***<br>[0.000205] | -0.416***<br>[0.0690] | 1.11***<br>[0.0688] | 2.89***<br>[0.103] | -3.79***<br>[0.211] | 0.625  |
| 0.808***<br>[0.0410] | 0.0270***<br>[0.000204] | -                     | 1.04***<br>[0.0677] | 2.94***<br>[0.102] | -3.84***<br>[0.211] | 0.624  |
| 0.954***<br>[0.0433] | 0.0276***<br>[0.000201] | -0.209**<br>[0.0685]  | -                   | 3.20***<br>[0.102] | -4.34***<br>[0.210] | 0.617  |
| 1.86***<br>[0.0269]  | 0.0265***<br>[0.000211] | -0.579***<br>[0.0708] | 1.48***<br>[0.0696] | -                  | -2.63***<br>[0.213] | 0.602  |
| 0.868***<br>[0.0436] | 0.0272***<br>[0.000207] | -0.473***<br>[0.0675] | 1.32***<br>[0.0687] | 2.53***<br>[0.102] | -                   | 0.615  |
| 2.40***<br>[0.0631]  | -                       | -1.39***<br>[0.104]   | 3.26***<br>[0.102]  | 2.06***<br>[0.156] | -6.12***<br>[0.319] | 0.133  |
| 2.15***<br>[0.0607]  | -                       | -                     | 3.04***<br>[0.101]  | 2.22***<br>[0.156] | -6.36***<br>[0.321] | 0.121  |
| 2.74***<br>[0.0647]  | -                       | -0.843***<br>[0.107]  | -                   | 2.95***<br>[0.159] | -8.07***<br>[0.326] | 0.0650 |
| 3.07***<br>[0.0373]  | -                       | -1.50***<br>[0.105]   | 3.50***<br>[0.101]  | -                  | -5.28***<br>[0.314] | 0.121  |
| 2.39***<br>[0.0640]  | -                       | -1.51***<br>[0.105]   | 3.63***<br>[0.101]  | 1.46***<br>[0.155] | -                   | 0.109  |

Coefficients [standard errors] for the linear models. Here, \*\*\* denotes  $p < 0.001$ , \*\* denotes  $p < 0.01$ , \* denotes  $p < 0.05$ , and *NS* denotes not significant with significant level of p-value 0.05.

**Table G. Multilinear regression for the QXG network with Eqs. (2) and (5).**

$$M_i = c_0 + c_1 a_i^{exc} + c_2 a_i^{bal} + c_3 a_i^{ca} + c_4 a_i^{sh} + c_5 k_i.$$

| intercept            | $k$                     | exchange                        | balance             | coll. act.         | str. hole            | $R^2$ |
|----------------------|-------------------------|---------------------------------|---------------------|--------------------|----------------------|-------|
| 0.63***<br>[0.0482]  | 0.0600***<br>[0.000490] | 0.517**<br>[0.0628]             | 1.25***<br>[0.0815] | 3.24***<br>[0.127] | -2.41***<br>[0.174]  | 0.684 |
| 0.71***<br>[0.0474]  | 0.0597***<br>[0.000491] | -----                           | 1.35***<br>[0.0808] | 3.53***<br>[0.122] | -2.38***<br>[0.174]  | 0.682 |
| 0.657***<br>[0.0488] | 0.0611***<br>[0.000491] | 0.668***<br>[0.0629]            | -----               | 3.71***<br>[0.125] | -3.00***<br>[0.172]  | 0.675 |
| 1.46***<br>[0.0369]  | 0.0608***<br>[0.000507] | 0.960***<br>[0.0626]            | 1.75***<br>[0.0820] | -----              | -0.893***<br>[0.170] | 0.660 |
| 0.681***<br>[0.0486] | 0.0608***<br>[0.000493] | 0.496***<br>[0.0635]            | 1.50***<br>[0.0804] | 2.64***<br>[0.121] | -----                | 0.677 |
| 2.10***<br>[0.0769]  | -----                   | -0.102***<br>[0.103]            | 2.72***<br>[0.133]  | 4.23***<br>[0.209] | -4.81***<br>[0.285]  | 0.141 |
| 2.08***<br>[0.0756]  | -----                   | -----                           | 2.70***<br>[0.131]  | 4.17***<br>[0.201] | -4.82***<br>[0.285]  | 0.141 |
| 2.21***<br>[0.0785]  | -----                   | 0.208***<br>[0.104]             | -----               | 5.31***<br>[0.207] | -6.22***<br>[0.283]  | 0.100 |
| 3.21***<br>[0.0552]  | -----                   | 0.467***<br>[0.102]             | 3.40***<br>[0.132]  | -----              | -2.86***<br>[0.275]  | 0.101 |
| 2.23***<br>[0.0778]  | -----                   | -0.161 <sup>NS</sup><br>[0.105] | 3.26***<br>[0.131]  | 3.04***<br>[0.200] | -----                | 0.113 |

Coefficients [standard errors] for the linear models. Here, \*\*\* denotes  $p < 0.001$ , \*\* denotes  $p < 0.01$ , \* denotes  $p < 0.05$ , and *NS* denotes not significant with significant level of p-value 0.05.



**Table H. Multilinear regression for the POK network with Eqs. (2) and (5).**

$$M_i = c_0 + c_1 a_i^{exc} + c_2 a_i^{bal} + c_3 a_i^{ca} + c_4 a_i^{sh} + c_5 k_i.$$

| intercept | $k$        | exchange | balance | coll. act. | str. hole           | $R^2$  |
|-----------|------------|----------|---------|------------|---------------------|--------|
| 0.669***  | 0.0222***  | 0.691*** | 2.29*** | 3.15***    | -1.34***            | 0.264  |
| [0.0414]  | [0.000362] | [0.0571] | [0.110] | [0.0987]   | [0.126]             |        |
| 0.859***  | 0.0223***  |          | 2.44*** | 3.23***    | -1.31***            | 0.257  |
| [0.0385]  | [0.000364] |          | [0.110] | [0.0989]   | [0.126]             |        |
| 0.738***  | 0.0228***  | 0.817*** |         | 3.34***    | -1.57***            | 0.245  |
| [0.0418]  | [0.000365] | [0.0575] |         | [0.0995]   | [0.127]             |        |
| 1.67***   | 0.0221***  | 0.814*** | 2.62*** |            | 0.140***            | 0.219  |
| [0.0278]  | [0.000373] | [0.0587] | [0.113] |            | [0.121]             |        |
| 0.713***  | 0.0223***  | 0.675*** | 2.39*** | 2.77***    |                     | 0.259  |
| [0.0413]  | [0.000363] | [0.0573] | [0.110] | [0.0920]   |                     |        |
| 0.921***  |            | 0.760*** | 2.85*** | 3.13***    | -1.67***            | 0.0977 |
| [0.0456]  |            | [0.0632] | [0.122] | [0.109]    | [0.139]             |        |
| 1.13***   |            |          | 3.01*** | 3.21***    | -1.63***            | 0.0898 |
| [0.0423]  |            |          | [0.121] | [0.109]    | [0.140]             |        |
| 1.02***   |            | 0.920*** |         | 3.36***    | -1.96***            | 0.0680 |
| [0.0461]  |            | [0.0639] |         | [0.111]    | [0.141]             |        |
| 1.91***   |            | 0.882*** | 3.17*** |            | -0.19 <sup>NS</sup> | 0.0532 |
| [0.0303]  |            | [0.0646] | [0.124] |            | [0.133]             |        |
| 0.978***  |            | 0.741*** | 2.98*** | 2.64***    |                     | 0.0899 |
| [0.0455]  |            | [0.0635] | [0.122] | [0.102]    |                     |        |

Coefficients [standard errors] for the linear models. Here, \*\*\* denotes  $p < 0.001$ , \*\* denotes  $p < 0.01$ , \* denotes  $p < 0.05$ , and *NS* denotes not significant with significant level of p-value 0.05.

**Table I. Multilinear regression for the LJ network with Eqs. (2) and (5).**

$$M_i = c_0 + c_1 a_i^{exc} + c_2 a_i^{bal} + c_3 a_i^{ca} + c_4 a_i^{sh} + c_5 k_i.$$

| intercept           | $k$                     | exchange           | balance             | coll. act.            | str. hole            | $R^2$  |
|---------------------|-------------------------|--------------------|---------------------|-----------------------|----------------------|--------|
| 1.24***<br>[0.0207] | 0.00305***<br>[5.76e-5] | 1.30**<br>[0.111]  | 4.47***<br>[0.0513] | 0.804***<br>[0.0545]  | 1.46***<br>[0.0549]  | 0.195  |
| 1.26***<br>[0.0206] | 0.00305***<br>[5.76e-5] |                    | 4.56***<br>[0.0507] | 0.787***<br>[0.0545]  | 1.48***<br>[0.0549]  | 0.194  |
| 1.18***<br>[0.0219] | 0.00366***<br>[6.04e-5] | 2.88***<br>[0.116] |                     | 2.52***<br>[0.0537]   | 0.638***<br>[0.0571] | 0.103  |
| 1.48***<br>[0.0129] | 0.00301***<br>[5.76e-5] | 1.26***<br>[0.111] | 4.74***<br>[0.0479] |                       | 1.75***<br>[0.0512]  | 0.193  |
| 1.23***<br>[0.0208] | 0.00304***<br>[5.79e-5] | 1.38***<br>[0.112] | 4.23***<br>[0.0508] | 1.33***<br>[0.0510]   |                      | 0.186  |
| 1.32***<br>[0.0211] |                         | 1.32***<br>[0.113] | 4.80***<br>[0.0520] | 0.671***<br>[0.0556]  | 1.43***<br>[0.0560]  | 0.160  |
| 1.35***<br>[0.0210] |                         |                    | 4.89***<br>[0.0514] | 0.6534***<br>[0.0556] | 1.45***<br>[0.0561]  | 0.159  |
| 1.27***<br>[0.0224] |                         | 3.03***<br>[0.119] |                     | 2.51***<br>[0.0551]   | 0.531***<br>[0.0587] | 0.0505 |
| 1.52***<br>[0.0132] |                         | 1.28**<br>[0.113]  | 5.02***<br>[0.0486] |                       | 1.68***<br>[0.0523]  | 0.158  |
| 1.31***<br>[0.0212] |                         | 1.39**<br>[0.114]  | 4.56***<br>[0.0515] | 1.19***<br>[0.0520]   |                      | 0.152  |

Coefficients [standard errors] for the linear models. Here, \*\*\* denotes  $p < 0.001$ , \*\* denotes  $p < 0.01$ , \* denotes  $p < 0.05$ , and *NS* denotes not significant with significant level of p-value 0.05.

**Table J. Multilinear regression for the PRO network with Eqs. (2) and (5).**

$$M_i = c_0 + c_1 a_i^{exc} + c_2 a_i^{bal} + c_3 a_i^{ca} + c_4 a_i^{sh} + c_5 k_i.$$

| intercept             | $k$                   | coll. act.          | str. hole           | $R^2$ |
|-----------------------|-----------------------|---------------------|---------------------|-------|
| -0.405***<br>[0.0382] | 0.137***<br>[0.00128] | 3.83***<br>[0.0810] | 3.67***<br>[0.134]  | 0.625 |
| -0.412***<br>[0.0398] | 0.139***<br>[0.00133] | -----               | 4.53***<br>[0.0800] | 0.594 |
| 1.07***<br>[0.0246]   | 0.131***<br>[0.00142] | 5.65***<br>[0.142]  | -----               | 0.533 |
| 0.891***<br>[0.0545]  | -----                 | 3.10***<br>[0.121]  | 4.50***<br>[0.201]  | 0.154 |
| 2.05***<br>[0.0309]   | -----                 | -----               | 6.07***<br>[0.198]  | 0.093 |
| 0.906***<br>[0.0559]  | -----                 | 3.93***<br>[0.118]  | -----               | 0.108 |

Coefficients [standard errors] for the linear models. Here, \*\*\* denotes  $p < 0.001$ , \*\* denotes  $p < 0.01$ , \* denotes  $p < 0.05$ , and *NS* denotes not significant with significant level of p-value 0.05.

### **Text A. $k$ -shell index**

In order to assign  $k$ -shell index, we remove all nodes with degree less than  $k$  until no nodes less than  $k$  remains. Then the maximum subgraph whose remained degree is larger than  $k$  is called  $k$ -core.  $k$ -shell is the set of all nodes belonging to the  $k$ -core but not to the  $(k + 1)$ -core. As a result, each node is assigned with a unique  $k$ -shell index.

### **Text B. Identifying structural hole in the link community**

In order to identify the intercommunity links, called the structural hole, we use the link community detection method proposed in [1]. We adapt the method for local version only using local information of networks. When a new link  $e_{ik}$  is added, likewise the original link community algorithm [1], we define the similarity  $S(e_{ik}, e_{jk})$  between two links  $e_{ik}$  and each of existed links  $e_{jk}$  by following,

$$S(e_{ik}, e_{jk}) = \frac{|n_+(i) \cap n_+(j)|}{|n_+(i) \cup n_+(j)|}, \quad (1)$$

where  $n_+(i)$  is the set of neighbors of node  $i$ . If the similarity is less than a certain threshold meaning that two neighbors have only few fraction of common friends, we judge the newly added link as a structural hole.

## **References**

1. Ahn YY, Bagrow JP, Lehmann S, Link communities reveal multiscale complexity in networks, Nature. 2010;466(7307):761-764.
